# Supplementary material for: Integrated analysis reveals the molecular features of fibrosis in triple-negative breast cancer
Source: PubMed Central journal article supplement — Mol Ther Oncolytics. 2022 Feb 17;24:624–35. doi: 10.1016/j.omto.2022.02.003 (PMC8898759; doi:10.1016/j.omto.2022.02.003), 2022-02-17
Supplement: mmc1.pdf [file mmc1.pdf]

**OMTO, Volume 24**

**Supplemental information**

**Integrated analysis reveals  
the molecular features of fibrosis  
in triple-negative breast cancer**

**Jia-Han Ding, Yi Xiao, Shen Zhao, Ying Xu, Yu-Ling Xiao, Zhi-Ming Shao, Yi-Zhou Jiang, and Gen-Hong Di**

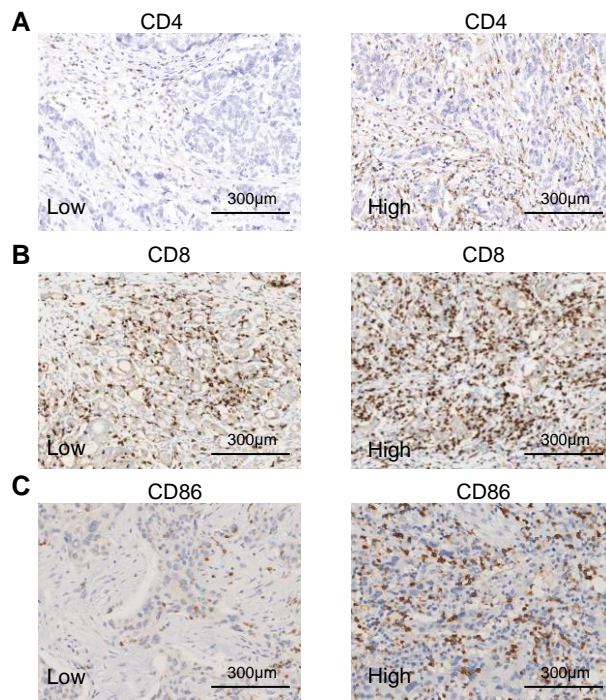

**Figure S1. Representative images of IHC staining for CD4, CD8 and CD86.**

(A) CD4 IHC staining. (B) CD8 IHC staining. (C) CD86 IHC staining.

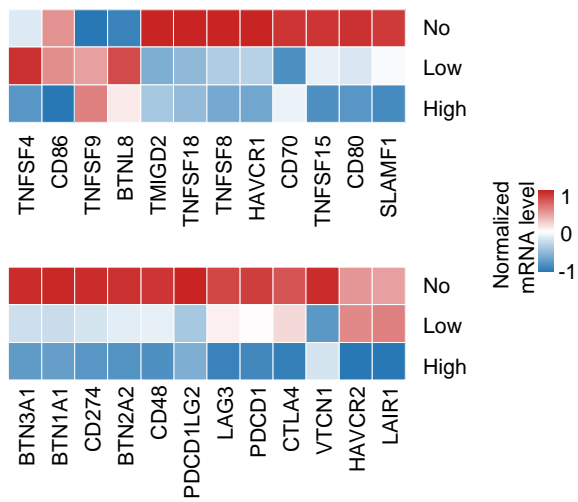

**Figure S2. Expression of immunomodulators among three subgroups of fibrosis.**

Expression of costimulatory molecules (upper) and coinhibitory molecules (lower) among three subgroups of fibrosis.

## **Supplementary Tables**

Table S1. The clinicopathological information of all patients with the evaluation of fibrosis.

Table S2. Results of mutation frequency comparison between the high and no fibrosis group.

Table S3. Results of copy-number gain/amplification frequency comparison between the high and no fibrosis group.

Table S4. Results of copy-number loss/deletion frequency comparison between the high and no fibrosis group.

Table S5. Results of differentially expressed genes (DEGs) between the high and no fibrosis group.

Table S6. IHC data for CD4, CD8 and CD86.

Table S7. Abundance of pan-CAF subtypes calculated by CIBERSORTx.
